# Supplementary material for: Identifying main finding sentences in clinical case reports
Source: Database (Oxford). 2020 Jun 11;2020:baaa041. doi: 10.1093/database/baaa041 (PMC7287507; doi:10.1093/database/baaa041)
Supplement: Supplemental_File_1_Manual_Corpus_(1)_baaa041 [file supplemental_file_1_manual_corpus_(1)_baaa041.xlsx]

## Sheet: Supplemental file2-20200226meng
This Excel spreadsheet displays the main finding sentences of 200 clinical case reports as annotated by two raters SA and NS (see Methods for description).
PMID	title	SA typical case report? Y, N	SA is title main finding? Y,N,A,U	reconciled abstract main finding	SA alternate abstract main finding	NS alternate abstract main finding	SA abstract S,U, M	SA abstract section
28150524	Akinetic mutism and the story of David.	Y	Y	Following a description about the characteristics of akinetic mutism (AM) and how it differs from locked-in syndrome (LIS) and a disorder of consciousness (DOC), we present the case of David, a 71-year-old man with AM.			U
28294507	Exophthalmos due to sterile neutrophilic dermatosis in a dog.	Y	Y	null			U
28386743	Anomalous inferior mesenteric artery supplying the ascending, transverse, descending, and sigmoid colons.	Y	Y	We have encountered in our anatomical practice the first case and an extremely rare second case in which the ascending, transverse, descending, and sigmoid colons were supplied by the inferior mesenteric artery.			U
28508240	Atlantoaxial dislocation and os odontoideum in two identical twins: perspectives on etiology.	Y	Y	To emphasize the congenital theory, we report a pair of identical twins both with atlantoaxial dislocation and os odontoideum, which is believed to be a congenital defect.		We present two 14-year-old identical twins with atlantoaxial dislocation and os odontoideum.	S	Purpose
28677880	Study of the in vitro and in vivo metabolism of the tryptamine 5-MeO-MiPT using human liver microsomes and real case samples.	Y	Y	This study presents a case of 5-MeO-MiPT intoxication and the structural elucidation of metabolites in pooled human liver microsomes (pHLM), blood, and urine.			U
28721627	Two Chinese pedigrees of Blau syndrome with thirteen affected members.	Y	Y	We reported two Chinese families with BS, which were by far the two largest pedigrees in the Chinese population.			U
28730947	Safety of nitric oxide added to the ECMO circuit: a pilot study in children.	Y	Y	We describe our experience of 30 consecutive children supported with ECMO and receiving 20 ppm of nitric oxide in the oxygenator of the ECMO circuit.			U
28760617	Well-differentiated, pedunculated liposarcoma of the hypopharynx.	Y	Y	Well-differentiated liposarcoma is the most common form of liposarcoma, but is only exceptionally reported in the hypopharynx.			S	Discussion
28816096	Management of severe pulmonary hemorrhage in a neonate on veno-arterial ECMO by the temporary clamping of the endotracheal tube - a case report.	Y	Y	null
28823645	Ictal single photon emission computed tomographic study of myoclonic absence seizures.	Y	Y	Here, we report the first characterization of the ictal phase of MAs by single photon emission computed tomography (SPECT).			S	Background
28879496	Tinea corporis caused by Trichophyton equinum in a rider and review of the literature.	Y	Y	We describe a case of tinea corporis caused by T. equinum on a buttock of a rider who often rode bareback with short trousers.			S	Case Report
28915140	Life-Threatening Massive Hemoptysis After Cryoablation for Atrial Fibrillation.	Y	Y	To our knowledge, this is the first reported case of massive hemoptysis associated with cryoballoon ablation, presenting 1 month after procedure.			U
29017975	Suturing Treatment for Blood Blister-Like Aneurysm in Supraclinoid Segment of Internal Carotid Artery.	Y	Y	We describe 5 cases of ruptured BBAs in the supraclinoid segment of the internal carotid artery, which were treated successfully using a suturing technique.			S	Case Description
29030075	Giant Abdominal Wall Pseudocyst After Open Radical Cystectomy.	Y	Y	Here, we report imaging findings of a giant pseudocyst in the anterior abdominal wall after an open radical cystectomy.			U
29030084	Characterization and use of the novel human multiple myeloma cell line MC-B11/14 to study biological consequences of CRISPR-mediated loss of immunoglobulin A heavy chain.	Y	Y	This study describes the establishment of a new human MM cell line tool with which to study disease biology and the use of CRISPR technology to create a potentially useful model with which to study MM light-chain escape.	In the current study, we describe the establishment of a monoclonal immunoglobulin A (IgA) kappa (κ) MM cell line designated MC-B11/14.	In the current study, we describe the establishment of a monoclonal immunoglobulin A (IgA) kappa (κ) MM cell line designated MC-B11/14.	U
29044698	Methotrexate treatment in a case of juvenile pityriasis rubra pilaris.	Y	Y	We present a case in which methotrexate led to significant improvement of the skin findings in a child with type IV juvenile pityriasis rubra pilaris.			U
29058245	Ocular findings in a patient with oculofaciocardiodental (OFCD) syndrome and a novel BCOR pathogenic variant.	Y	Y	To report a case of OFCD associated with a de novo BCOR pathogenic variant and highlight the ocular findings and possible mechanisms.			S	Purpose
29075882	Tip Migration Post-Contrast Pressure Injection Through Pressure-Injectable Peripherally Inserted Central Catheters Causing Vascular Injury: A Report of 3 Cases.	Y	Y	In this case review, we present three cases of PICC tips migrating post-CT contrast pressure injection including into the pleural cavity and subsequent complications, to raise awareness of this complication not previously encountered in our institution.			U
29080054	Double pituitary adenomas associated with persistent trigeminal artery: a rare case report and the review of literature.	Y	Y	We present a quite unique case of double pituitary adenomas associated with persistent trigeminal artery (PTA) treated by endoscopic surgery.	We observed an extremely rare case of double pituitary adenomas associated with PTA.	We observed an extremely rare case of double pituitary adenomas associated with PTA.	U
29093393	Retroperitoneal Perforation Caused by Migration of a Pancreatic Spontaneous Dislodgement Stent into Periampullary Diverticula.	Y	Y	null			U
29103620	An unusual cause of heart failure in a young man.	Y	A	null			U
29119572	Use of skin stretchers for single-stage bilateral mastectomies in a dog and a cat.	Y	Y	To describe the application of skin stretchers for closure of single-stage bilateral mastectomies in a dog and a cat.			S	Objective
29128933	Proven Invasive Pulmonary Aspergillosis in Stem Cell Transplant Recipient Due to Aspergillus sublatus, a Cryptic Species of A. nidulans.	Y	Y	Although this is the first case of proven IPA attributed to A. sublatus, we demonstrated that at least some previously reported infections due to A. quadrilineatus were probably caused by this cryptic species.			U
29166805	A case of repeated mixed mood episodes with psychotic symptoms associated with the premenstrual period in a patient with polycystic ovarian syndrome.	Y	Y	We present the case of a young woman with polycystic ovarian syndrome, who experienced three episodes of premenstrual mixed mood and psychotic symptoms.			U
29190002	Dentoalveolar Abscesses Not Associated with Caries or Trauma: A Diagnostic Hallmark of Hypophosphatemic Rickets Initially Misdiagnosed as Hypochondroplasia.	Y	Y	null			U
29193639	Oligonephronia and Wolf-Hirschhorn syndrome: A further observation.	Y	Y	We describe a case of a male 9 years old children with WHS proteinuria and hypertension.			U
29203309	Spontaneous Acute Arterial Subdural Hematoma.	Y	Y	We report a rare case of acute SDH and present a review of the literature.			S	Conclusions
29204353	Sphingomonas paucimobilis presenting as acute phlebitis: A case report.	Y	Y	Here in, is the first case report of Acute Sphingomonas phlebitis secondary to intravenous (IV) drug use.			U
29205875	A case report of basic calcium phosphate deposition disease mimicking septic arthritis.	Y	Y	We report a case of a 53-year-old man who presented with a diagnostic dilemma mimicking septic arthritis.			U
29212862	Ataxia with oculomotor apraxia type 2: an evolving axonal neuropathy.	Y	Y	After extensive neurological review, she was diagnosed with ataxia with oculomotor apraxia type 2.			U
29215409	Imaging of Acquired Demyelinating Syndrome With 18F-FDG PET/CT.	Y	Y	Only a few cases of acquired demyelinating syndrome have been imaged with F-FDG PET/CT.			U
29255784	Dermatomyositis - key to diagnosing ovarian cancer, monitoring treatment and detecting recurrent disease: Case report.	Y	Y	Young women with dermatomyositis are at high risk for underlying ovarian cancer.			U
29260669	Emmonsia helica Infection in HIV-Infected Man, California, USA.	Y	Y	We report a fatal case of E. helica infection in a man with advanced HIV infection from California, USA, who had progressive respiratory failure and a brain abscess.			U
29261628	Subacute Cerebellar Infarction With Uptake on 68Ga-Prostate-Specific Membrane Antigen PET/CT.	Y	Y	We report a case of subacute cerebellar infarction mimicking metastasis on prostate-specific membrane antigen (PSMA) PET/CT.			U
29274205	Arthrogryposis and pterygia as lethal end manifestations of genetically defined congenital myopathies.	Y	Y	In this report, four fetal or perinatal autopsy cases of arthrogryposis were studied by gross morphology, microscopic histopathologic examination, and whole genome sequencing of postmortem DNA.			U
29293124	Cutaneous Metaplastic Carcinoma: Report of a Case With Sebaceous Differentiation.	Y	Y	To our knowledge, the literature does not mention sebaceous carcinoma in cutaneous metaplastic carcinoma.			U
29305273	Adult-Onset Hemorrhagic Quasi-Moyamoya Disease with Unilateral Steno-occlusive Lesion in a Patient with Neurofibromatosis Type 1.	Y	Y	This is the first reported case of quasi-moyamoya disease with a rare combination of characteristics, including an adult-onset, hemorrhagic presentation and a unilateral lesion in a patient previously diagnosed with NF1.			S	Conclusions
29305568	Novel compound heterozygous variants in the LHCGR gene identified in a subject with Leydig cell hypoplasia type 1.	Y	Y	This study aimed to analyze the clinical presentation and diagnosis as well as highlight the molecular characteristics of a subject with LCH type 1.			S	Background
29342033	Meningoencephalocele and Cerebrospinal Fluid Leak Complicating Orbital Decompression.	Y	Y	The authors report the third case to their knowledge of meningoencephalocele with cerebrospinal fluid leak after orbital decompression and discuss its management and measures that can be taken to prevent this rare but serious complication.			U
29343221	A case of molecularly profiled extraneural medulloblastoma metastases in a child.	Y	Y	To the best of our knowledge, this is the first molecularly characterized report of extraneural metastases of medulloblastoma in a child.			S	Conclusion
29352490	Oral lichenoid reaction showing multiple ulcers associated with anti-programmed death cell receptor-1 treatment: A report of two cases and published work review.	Y	Y	We report two cases of oral lichenoid reaction showing multiple ulcers associated with nivolumab treatment.			U
29352650	Cryptococcus gattii genotype VGIIa infection imported from Vancouver Island to Japan.	Y	Y	This is the first imported case of Cryptococcus gattii genotype VGIIa infection from endemic area of North America to Japan.			U
29356004	Training switching focus with a mobile-application by a patient suffering from AVH, a case report.	N	Y	We describe the use of a cognitive trainings app by a young woman with highly resistant hallucinations.			U
29364017	VRAM steal syndrome - a unique cause of flap necrosis in chest wall reconstruction.	Y	Y	We describe a previously unreported complication of partial flap loss due to 'steal syndrome', whereby arterial supply was diverted away from the flap due to dialysis from an ipsilateral arteriovenous fistula.			U
29367356	Multiple anomalies in the origin and course of vertebral arteries and aberrant right subclavian artery in a child with moyamoya syndrome.	Y	Y	In this case report, we present a patient with moyamoya syndrome (MMS) and Down syndrome (DS) who has bilateral symmetrical segmental agenesis of VAs, left VA originating from aortic arch and anomalous origin of right VA arising from CCA in combination with an aberrant right SCA.			U
29378343	Anti-Yo-Associated Paraneoplastic Cerebellar Degeneration Manifesting as Acute Cerebellitis with Posterior Cranial Fossa Hypertension.	Y	Y	To our knowledge, this is the first described case of an anti-Yo PCD that has manifested as acute posterior cranial fossa hypertension owing to diffuse cerebellar edema.			S	Conclusions
29393808	Imaging and surgical approach to a pediatric penetrating intradural wooden splinter: case report.	Y	Y	Only 6 cases of wooden fragments causing penetrating intradural spinal injury have been reported.			U
29396835	Successful endoscopic sphincterotomy for choledocholithiasis in a patient with severe hemophilia A and inhibitors.	Y	Y	null			U
29402880	Adenocarcinoma in a Blind Loop of the Ileum 53 Years After an Ileotransversostomy Procedure.	Y	Y	Adenocarcinoma of the ileum should be considered in postoperative patients with ileotransversostomy.			S	Conclusions
29422734	Cardiotoxic Effects of Raw Opium.	Y	Y	Here, we present a case of poisoning due to ingestion of raw opium leading to severe myocardial suppression.			U
29440859	Nevus Comedonicus on Scalp: An Unusual Presentation.	Y	Y	We hereby report a rare case of NC on scalp in a 14-year-old boy.			U
29441340	Small bowel obstruction from distant metastasis of primary breast cancer: a case report.	Y	Y	We present a patient with small bowel obstruction from distant metastasis of primary breast cancer.			U
29445466	Oral nerve sheath myxoma: a rare and unusual intraoral neoplasm.	Y	Y	We present a rare case of intraoral nerve sheath myxoma.			U
29448830	Pulmonary mucormycosis mimicking an endobronchial mass.	Y	Y	We describe a case of endobronchial mucormycosis in which the fungal mass was completely removed via rigid bronchoscopy before medical therapy.			U
29483011	Histology of hemangioblastoma treated with stereotactic radiosurgery confirms its effectiveness.	Y	Y	Here we present histology of VHLD-associated hemangioblastoma tissue resected three months after SRS because of cyst enlargement.			U
29484933	Bowel obstruction caused by broad ligament hernia sucessfully repaired by laparoscopy.	Y	Y	We present a case of small bowel obstruction in a 37-year-old woman caused by internal herniation through a defect in broad ligament, which was managed by laparoscopic surgery.			U
29487647	Balloon occlusion technique with ethylene vinyl alcohol for the treatment of a pediatric pulmonary artery mycotic aneurysm.	Y	Y	This report describes a combined balloon occlusion technique with the injection of ethylene-vinyl alcohol copolymer for the treatment of a mycotic aneurysm of the pulmonary artery secondary to infective endocarditis.			U
29491619	Mucormycosis in immunocompetent patient resulting in extensive maxillary sequestration.	Y	Y	We present here a case report of oral mucormycosis in a 32-year-old male, immunocompetent individual resulting in extensive maxillary sequestration.			U
29503834	Methamphetamine-Induced Cardiomyopathy (MACM) in a Middle-Aged Man; a Case Report.	Y	Y	In addition to raising awareness, our case provides an outline of how MACM patients likely may present and the subsequent morbid sequela.			U
29503871	Probe-Based Confocal Laser Endomicroscopy Using Acrinol as a Novel Dye Can Be Used to Observe Cancer Nuclei of Bladder Carcinoma In Situ.	Y	Y	In this case report, we describe observing the nuclei of urothelial carcinoma cells in situ that were not visible with cystoscopy under white light using probe-based confocal laser endomicroscopy (pCLE) with acrinol and fluorescein during transurethral resection of a bladder tumor (TURBT).	pCLE using acrinol as a novel dye can help observe the cancerous nuclei of bladder CIS that cannot be detected using conventional cystoscopy under white light.	pCLE using acrinol as a novel dye can help observe the cancerous nuclei of bladder CIS that cannot be detected using conventional cystoscopy under white light.	S	Background
29513899	Abdominal visceral perforation by buried peritoneal dialysis catheters: Cause or coincidence?	Y	Y	We report two patients who presented with asymptomatic visceral perforation from their buried PD catheters.			U
29516937	Bone metastases without primary tumor: A well-differentiated follicular thyroid carcinoma case.	Y	Y	We report and discuss a unique case of a 70-year-old female patient presenting with arm pain, diagnosed with metastatic well-differentiated follicular carcinoma without a primary tumor in the thyroid.			U
29519750	De novo HDAC8 mutation causes Rett-related disorder with distinctive facial features and multiple congenital anomalies.	Y	Y	We present a unique 11-year-old girl showing clinical features of Rett-related disorder with distinctive facial features and multiple congenital anomalies including ocular hypertelorism, arched eyebrows, a broad nose, dental anomalies, congenital heart disease, truncal obesity, and epilepsy. A novel de novo mutation in histone deacetylase 8 (HDAC8) (c.652G > T, p.Gly218Cys) was confirmed by whole…			U
29526944	Posterior Reversible Encephalopathy Syndrome after a Variety of Combined Chemotherapies Containing Bevacizumab for Metastatic Colon Cancer.	Y	Y	null	Posterior reversible encephalopathy syndrome (PRES) was diagnosed, and treatments resulted in improvement of the MRI findings, but the patient experienced cerebral infarction and ultimately died of deterioration of cancer on day 26 after the onset of PRES.	Posterior reversible encephalopathy syndrome (PRES) was diagnosed, and treatments resulted in improvement of the MRI findings, but the patient experienced cerebral infarction and ultimately died of deterioration of cancer on day 26 after the onset of PRES.	U
29526950	Pulmonary Adenocarcinoma, Harboring Both an EGFR Mutation and ALK Rearrangement, Presenting a Stable Disease to Erlotinib and a Partial Response to Alectinib.	Y	Y	null			U
29541571	A Rare Case of Presacral Epidermoid Cyst in an Adult Male: Emphasis on Diffusion Weighted Magnetic Resonance Sequences in Preoperative Imaging.	Y	Y	We report a case of presacral epidermoid cyst in a 55-year-old male who presented to our emergency department with acute urinary retention and history of chronic constipation.	Presacral epidermoid cysts have been previously reported in women, however are extremely rare in males.	Presacral epidermoid cysts have been previously reported in women, however are extremely rare in males.	U
29545434	Management of tumour lysis syndrome during first-line palliative chemotherapy for high-volume colorectal cancer.	Y	Y	This case report is intended to highlight risk factors for TLS in solid tumours and focus on treatment and secondary prophylaxis of TLS.			U
29555396	Novel Vertebral Artery Flow Reversal Method for Preventing Ischemic Complication during Endovascular Intervention.	Y	Y	We report a secure endovascular approach for the treatment of vascular lesions of the posterior circulation. Even if a large profile guide catheter is wedged in the unilateral vertebral artery (VA), our VA flow reversal method can prevent ischemic complications, including the spinal cord infarction.			S	Background and purpose
29570921	Confirmed microsporidial graft infection in a HIV-negative renal transplant recipient: A case report and review of the literature.	Y	Y	Here, we report a case of a non-HIV-infected renal transplant patient with microsporidiosis of the renal tract associated with acute graft dysfunction.			U
29593917	A Case of Unresolved and Worsening Retroperitoneal Abscess.	Y	Y	Herein, we present a case of retroperitoneal abscess secondary to a perforation that occurred during an ERCP.			U
29594148	C3 Glomerulopathy and Atypical Hemolytic Uremic Syndrome: Two Important Manifestations of Complement System Dysfunction.	Y	Y	This article focuses on the clinical differences, pathophysiology, and treatment of aHUS and C3 glomerulopathy.			U
29602003	Deep Brain Stimulation Surgery for Status Dystonicus: A Single-Center Experience and Literature Review.	Y	Y	In this case series, we describe our experience with early DBS placement in 5 patients with SD to control symptoms that are refractory to pharmacologic therapy.			S	Methods
29605375	Nasal erosion as an uncommon sign of child abuse.	Y	Y	We report 6 cases of child abuse manifesting as overt nasal destruction.			U
29617078	Complete supine percutaneous nephrolithotomy with GoPro®. Ten steps for success.	N	Y	To show a video of a complete supine Percutaneous Nephrolithotomy (csPCNL) performed for the treatment of a staghorn calculus, from the surgeon's point of view.			S	Objective
29637532	Giant Pulmonary Hamartoma with Dominant CD34- Positive Smooth Muscle Cell Component.	Y	Y	We report a unique case of giant pulmonary hamartoma with a dominant CD34 (+) SMC component.			U
29637535	Raltegravir-associated Diabetic Ketoacidosis in a Patient with HIV Infection: A Case Report.	Y	Y	Accordingly, diabetic ketoacidosis was considered to be associated with INSTI.			U
29643135	Arthroscopic reduction and fixation of a lateral inverted osteochondral fracture of the talus ('LIFT').	Y	Y	We present a successful arthroscopic fixation of a LIFT lesion in a 45-year-old active man.			U
29672995	Transient left septal fascicular block and left anterior fascicular block as a consequence of proximal subocclusion of the left anterior descending coronary artery.	Y	Y	The association of left anterior fascicular block (LAFB) with left septal fascicular block (LSFB) characterizes a left bifascicular block subtype rarely described in the literature, probably due to the fact that most researchers are not aware of the existence of the left septal fascicle.			U
29673818	Bilateral Temporal Extradural Hematoma on Top of Bilateral Temporal Arachnoid Cyst: First Case Report and Extensive Literature Review.	Y	Y	We report the case of a 25-year-old man with a known bilateral AC who was involved in a motor vehicle accident and developed a bilateral temporal EDH.	Bilateral temporal EDH in a bilateral temporal AC has never been reported in the literature.	Bilateral temporal EDH in a bilateral temporal AC has never been reported in the literature.	S	Case description
29679504	Intraoral frostbite and Leidenfrost effect.	Y	Y	Here, we report the first case of intraoral frostbite as a result of direct injury to the tissues due to ingestion of liquid nitrogen.			U
29681826	Frontal Phonological Agraphia and Acalculia with Impaired Verbal Short-Term Memory due to Left Inferior Precentral Gyrus Lesion.	Y	Y	We report a patient with phonological agraphia (selective impairment of kana [Japanese phonetic writing] nonwords) and acalculia (mental arithmetic difficulties) with impaired verbal short-term memory after a cerebral hemorrhage in the opercular part of the left precentral gyrus (Brodmann area 6) and the adjacent postcentral gyrus.			U
29682374	Delayed Appearance of a Traumatic Fetal Intracranial Hemorrhage.	Y	Y	null			S
29686837	Effort thrombosis of the subclavian artery as a consequence of a unique anomaly.	Y	Y	We describe here a patient with arterial thromboembolism following a fall on the outstretched arm, who was found to have subclavian artery stenosis and post-stenotic dilatation in the absence of a bony abnormality. Surgical exploration revealed a previously undescribed anomaly in which the subclavian artery passed through the costoclavicular space in front of the anterior scalene muscle, where it…			U
29691901	Webbed left atrial septal pouch-A new anatomical variant.	Y	Y	We describe webbed left atrial septal pouch (LSP), a new variant in the spectrum of fusion of septum primum and septum secundum.			U
29699466	Delayed Subclavian Artery Aneurysm Following Fixation of a Clavicular Fracture.	Y	Y	We present the case of a left subclavian artery aneurysm with radial artery thrombotic sequelae following an injury and screw-plate fixation of his left clavicle.			U
29705404	Oral lichen sclerosus: an overview and report of three cases.	Y	Y	Here we present three new cases of oral lichen sclerosus.			U
29706133	Intestinal paracoccidioidomycosis resembling Crohn's disease in a teenager: a case report.	Y	Y	Paracoccidioidomycosis must be part of the differential diagnosis of inflammatory bowel diseases in endemic areas and must be excluded before starting immunosuppressive therapy.			S
29706440	Recurrent Acute Ischemic Stroke after Infective Endocarditis Caused by Streptococcus Constellatus: First Case Report and Analysis of the Case Series.	Y	Y	This is the first case report of recurrent ischemic stroke secondary to IE without vegetation caused by Streptococcus constellatus involving concurrence of acute anterior and posterior circulation.			U
29707227	Diabetes mellitus remission in a cat with pituitary-dependent hyperadrenocorticism after trilostane treatment.	Y	Y	To our knowledge this is the first reported case of diabetic remission in a feline patient with HAC as a result of treatment with trilostane.			S	Relevance and Novel Information
29713558	Effect of 4DryField® PH, a Novel Adhesion Barrier, on Recurrence of Intestinal Adhesions after Extensive Visceral Adhesiolysis.	Y	Y	In this retrospective one-center clinical trial, the course of patients with extensive abdominal adhesiolysis and application of a recent starch-based formulation, 4DryField PH (4DF), is analyzed.			S	Background
29731568	Toxoplasmosis submandibular lymphadenitis: Report of an unusual case with a brief review.	Y	Y	null			U
29732437	An awake, minimally-invasive, fully-endoscopic surgical technique for treating lumbar radiculopathy secondary to heterotopic foraminal bone formation after a minimally invasive transforaminal lumbar interbody fusion with BMP: technical note.	Y	Y	Here we present an awake, minimally invasive surgical approach for treating the radiculopathy that results from this excessive bone growth in the foramen.			U
29734172	Preemptive Delivery and Immediate Resection for Fetuses with High-Risk Sacrococcygeal Teratomas.	Y	Y	Here we report our experience applying "preemptive" delivery to fetuses who manifest signs of decompensation between 27 and 32 weeks.			S	Conclusions
29736172	Myocarditis Secondary to Mesalamine-Induced Cardiotoxicity in a Patient with Ulcerative Colitis.	Y	Y	We present the case of a gentleman with nonexertional chest pain in the setting of ulcerative colitis exacerbation believed to have occurred secondary to mesalamine.			U
29744075	Graves' orbitopathy after allogeneic bone marrow transplantation in a patient with Fanconi anemia - side effect of alemtuzumab therapy?	Y	Y	Our patient is the first case of Graves' orbitopathy after alemtuzumab conditioning for hematopoietic stem cell transplantation.			U
29750105	Lip repositioning technique. A simple surgical procedure to improve the smile harmony.	Y	Y	The aim of this article is to describe the lip repositioning technique to decrease gummy smile by a simple surgical procedure.			U
29754134	Surprising pathological and clinical manifestations of miliary tuberculosis.	Y	Y	We report a surprising pathological finding of miliary tuberculosis (TB) in a 49-year-old Chuukese, immunocompetent woman who was initially admitted to the hospital for a 1-month duration of chronic abdominal pain and intermittent fevers.			U
29756012	Needle fracture during endoscopic ultrasound-guided fine needle aspiration using a needle with a side hole.	Y	Y	Here, we report a case of needle fracture during EUS-FNA using a needle with a side hole.			U
29756067	Concurrent intraoperative uterine rupture and placenta accreta. Do preoperative chronic hypertension, preterm premature rupture of membranes, chorioamnionitis, and placental abruption provide warning to this rare occurrence?	Y	Y	We present the anesthetic management of a parturient who underwent an urgent cesarean delivery for non-reassuring fetal tracing in the setting of chronic hypertension, preterm premature rupture of membranes, and chorioamnionitis who was subsequently found to have placental abruption, uterine rupture, and placenta accreta.			U
29764448	Small bowel lymphoma presenting as inguinal hernia: case report and literature review.	Y	Y	null			S
29766907	Adenocarcinoma arising in a rectal duplication cyst with distant metastasis A case report and a review of the recent literature.	Y	Y	null			S	Case report
29785678	Heterotopic pancreas without Meckel's diverticulum in children as unique cause of gastrointestinal bleeding: think about it!	Y	Y	So far, there have been no case reports of jejunal bleeding from ectopic pancreas without Meckel's diverticulum in children.		We report a rare case of jejunum bleeding, due to an isolated HP in a 15-year-old adolescent.	U
29788940	Two cases in which 3D MRI was used to differentiate between a disc mass that mimics a tumor and neurinoma.	Y	Y	Herein, we describe the use of coronal MR images of 3D fast-field echo with water selective excitation in the diagnosis of disc sequestration mimicking a tumor.			S	Background
29790453	Thyroid Hypoplasia in Congenital Hypothyroidism Associated with Thyroid Peroxidase Mutations.	Y	Y	The first cases are reported of thyroid hypoplasia at diagnosis during the neonatal period in patients with CH and TPO mutations.			S	Background
29793466	The diagnosis and arthroscopic treatment of angioleiomyoma presenting loose body in the knee joint: two case reports.	Y	Y	Few studies have presented intra-articular angioleiomyoma and such cases become rarer and more difficult to diagnose when it presents as loose body.			S	Conclusion
29794824	Limbal Stem Cell Deficiency Secondary to Diffuse Non-necrotizing Anterior Scleritis: A Clinicopathological Report.	Y	Y	To report a case of limbal stem cell deficiency (LSCD) secondary to diffuse non-necrotizing anterior scleritis (DNNAS).			S	Purpose
29850266	Brugada Phenocopy Induced by Recreational Drug Use.	Y	Y	null			U
29854404	A unique combination of Rosai-Dorfman disease and mycosis fungoides: a case report.	Y	Y	This case report documents a unique combination of RDD and mycosis fungoides (MF), a cutaneous T cell lymphoma.			U
29857112	Irreversible Primary Amenorrhea Secondary to Uterine Damage and Premature Ovarian Failure in 2 Patients with Ewing Sarcoma.	Y	Y	We describe 2 adolescent patients with permanent premature ovarian failure and failure of endometrium to respond to estrogen after they received a combination of chemotherapy and pelvic radiation for metastatic Ewing sarcoma.			S
29859747	Toxoplasmic retinochoroiditis caused by Toxoplasma gondii strain ToxoDB#65.	Y	Y	Here, we describe clinical and epidemiological data for toxoplasmic retinochoroiditis in two Brazilian women infected by T. gondii strain ToxoDB#65, living in an urban region of São Paulo State, Brazil.			U
29863943	Rapid onset severe thrombocytopenia following reexposure to piperacillin-tazobactam: report of two cases and review of the literature.	Y	Y	We present two cases in whom severe and rapid development of thrombocytopenia has occurred subsequent to administration of piperacillin-tazobactam with a prior history of recent exposure to the drug.			U
29886218	Concomitant Hybrid Arch Vessel Reconstruction and Intracranial Clot Retrieval in Takayasu's Arteritis Presenting with Acute Cerebral Ischemia: A Case Report.	Y	Y	Hybrid vascular reconstruction for extracranial disease with concomitant clot retrieval for intracranial disease is a novel approach to achieving emergency revascularization in active TA.			S	Conclusions
29893349	Intraosseous neurofibroma in a 13-year-old male patient: A case report with review of literature.	Y	Y	This article presents a case report of neurofibroma on the posterior right side of the mandible of a 13-year-old boy who is the youngest patient in the series along with a review of literature.			U
29901637	Extracranial-intracranial bypass in medial sphenoid ridge meningioma associated with severe stenosis of the intracranial segments of the internal carotid artery: A case report.	Y	Y	Comprehensive treatment of tumor resection and extracranial-intracranial bypass concerning medial sphenoid ridge meningioma associated with severe stenosis of the internal carotid artery of intracranial segments is effective.			S	Patient concerns
29901642	Treatment of poststroke constipation with moxibustion: A case report.	Y	Y	Moxibustion is effective and safe for the treatment of constipation and improvement of the quality of life in post-stroke patients with constipation.			S	Lessons
29904039	An Unusual Cause of Cauda Equina Syndrome: Lumbar Epidural Venous Engorgement.	Y	Y	We report a case of extensive iliocaval thrombosis leading to epidural venous plexus and ascending lumbar vein engorgement as an outcome of deep venous thrombosis (DVT) due to probable adverse effects of oral combined contraceptive pills (OCCP).			S	Background
29910082	Hypertensive acute granulomatous anterior uveitis as a side effect of topical brimonidine.	Y	Y	Uveitis due to brimonidine is a rare adverse effect, but it must be known.			S	Clinical Case
29911935	Symptomatic carotid stenosis and ipsilateral carotid body tumor.	Y	Y	We report an unusual combination of a symptomatic carotid stenosis and ipsilateral carotid body tumor.			U
29930164	Long-term control of laryngeal plasma cell mucositis with systemic immunosuppression.	Y	Y	This is the first reported case of prolonged symptomatic improvement with the use of systemic immunosuppressive therapy with mycophenolate mofetil in PCM.			U
29940380	Positioning-Related Neuromonitoring Change During Anterior Cervical Discectomy and Fusion.	Y	Y	We report a case of transient loss in somatosensory evoked potentials signals during anterior cervical discectomy and fusion (ACDF) C4-7, which was mainly attributed to shoulder traction using a special device.			S	Case Description
29949529	Gastric signet-ring cell carcinoma with hypersecretion of β-Human chorionic gonadotropin and review of the literature.	Y	Y	We report a case of gastric signet-ring cell carcinoma with β-HCG hypersecretion and propose hypotheses to explain the pathogenesis of such hypersecretion.			U
29963438	Large Pleomorphic Adenoma of Hard Palate.	Y	Y	We report a case of an unusually large PA of the hard palate in a female patient involving left maxillary sinus and nasal cavity.			U
29970751	Should antiviral monotherapy with nucleotide analogs be the primary treatment option for focal segmental glomerulosclerosis-related nephrotic syndrome in chronic hepatitis B infection?	Y	A	We describe a case of nephrotic syndrome due to secondary tip variant FSGS in a patient with chronic HBV infection who went into complete remission with antiviral therapy alone and present an argument for the use of oral antiviral agents as the primary treatment option for FSGS-related nephrotic syndrome in chronic HBV-infected patients without progressive liver disease.			U
29975747	Relationship between alcohol co-ingestion and outcome in profenofos self-poisoning - A prospective case series.	Y	Y	We aimed to assess the effect of alcohol in acute poisoning with the lipophilic S-alkyl OP insecticide, profenofos.			S	Introduction
29977509	External iliac vein aneurysm: a case report and review of the literature.	Y	Y	We discuss the case of a 26-year-old man with an external iliac vein aneurysm, likely secondary to iatrogenic vascular trauma in the neonatal period.			U
29977863	Masson's Hemangioma of the Cheek: A Case Report.	Y	Y	We report a rare case of intravascular papillary endothelial hyperplasia (IPEH) of the cheek.			U
29982176	Respiratory failure caused by lipoid pneumonia from vaping e-cigarettes.	Y	Y	null			U
29988262	Different treatment approaches for the localized gingival overgrowths: Case series.	Y	Y	The purpose of case series is to present 6 different cases of localized gingival overgrowths and their management with the following techniques: nonsurgical periodontal treatment, gingivectomy, flap surgery, free gingival graft, gingival unit, and connective tissue graft.			U
30013767	A case series of Kimura's disease: a diagnostic challenge.	Y	Y	We report a case series of two cases with suspected KD at initial presentation, with one patient eventually diagnosed with Hodgkin's disease after clinical progression.			U
30013801	A Young Male with Severe Myocarditis and Skeletal Muscle Myositis.	Y	Y	null			U
30016784	Pembrolizumab in Recurrent Squamous Cell Carcinoma of the Vulva: Case Report and Review of the Literature.	Y	Y	We present the first case in the literature of a patient with recurrent vulvar cancer who was treated successfully with pembrolizumab.			U
30026763	Challenging diagnosis of congenital hyperinsulinism in two infants of diabetic mothers with rare pathogenic KCNJ11 and HNF4A gene variants.	Y	Y	Here we report 2 cases of CHI where the diagnoses were challenged and delayed because both patients were infants of diabetic mothers (IDMs) and had concomitant complicated medical conditions.	This case series is one of few reports in the medical literature describing two IDMs with persistent recurrent hypoglycemia secondary to CHI, and a different clinical phenotype for HNF4A-associated CHI.	This case series is one of few reports in the medical literature describing two IDMs with persistent recurrent hypoglycemia secondary to CHI, and a different clinical phenotype for HNF4A-associated CHI.	S	Case Presentation
30029636	A novel splice site mutation in WAS gene in patient with Wiskott-Aldrich syndrome and chronic colitis: a case report.	Y	Y	Our study found a novel, splice-site mutation in WAS gene and help consider the genetic counselling more precisely for families with clinical phenotypes of both Wiskott-Aldrich syndrome and inflammatory bowel disease and may suggest linked pathways between these two diseases.			S	Conclusions
30032929	Metastatic cardiophrenic lymph node resection following full-thickness resection of right diaphragm for advanced ovarian carcinoma.	Y	Y	We present a surgical technique for metastatic cardiophrenic lymph node resection following full-thickness resection of the right diaphragm.			S	Objective
30050714	Irritable Hip as the Inaugural Symptom for Neuroblastoma.	Y	Y	Null			S
30061266	Brainstem Glioblastoma Multiforme in a Patient with NF1.	Y	Y	This case report presents the first known case of a brainstem glioblastoma multiforme (GBM) in a patient with neurofibromatosis type 1 (NF1).			U
30069437	Twin Brothers with Carnitine Membrane Transporter Deficiency: A Case Study.	Y	Y	In this study, we reported twin brothers with PCD.			U
30069549	Percutaneous endoscopic lumbar discectomy via adjacent interlaminar space for highly down-migrated lumbar disc herniation: a technical report.	Y	Y	The purpose of this study was to determine the feasibility and efficacy of PELD for highly migrated LDH via the adjacent interlaminar space.			U
30078779	Large granular lymphocytic leukemia CD3-CD56-: a challenge for the biologist and the physician.	Y	Y	We report here the case of a 47-year-old woman patient diagnosed with large granular lymphocytes leukemia associated with atypical CD3-CD56- immunophenotyping and clinical manifestations of pseudo-Felty's syndrome.			U
30083630	Patient with a Subarachnoid Headache.	Y	Y	We report a risk management case of a patient with a missed SAH resulting in a fatal outcome.			U
30087781	Paradoxical hypertension.	Y	Y	0.1% of hypertensive patients harbor a pheochromocytoma or paraganglioma and its presentation as PRES is very rare.			U
30090011	Aneurysm formation of pericardial patch in Manouguian procedure.	Y	Y	We report an aneurysmal dilatation of pericardial patch in aortoplasty.			U
30094397	Bilateral BrightOcular iris implants necessitating explantation and subsequent endothelial keratoplasty.	Y	Y	To demonstrate the dangers associated with the BrightOcular iris implant, a model that had initially been touted as safer than its predecessors.			S	Conclusions and Importance
30100658	Is inhaled glucocorticoids the only culprit in angina bullosa hemorrhagica?	Y	A	We assume that our case not only supports the association of inhaled GCs with ABH but also suggests a possible role for NSAIDs in the pathogenesis of ABH.		Here, we describe a case with ABH, who had a drug history of inhaled GCs and nonsteroidal anti-inflammatory drugs (NSAIDs).	U
30101141	Incomplete Refractory Kawasaki Disease in an Infant-A Case Report and a Review of the Literature.	Y	Y	null			U
30105104	Ectopic Papillary Thyroid Cancer with Distant Metastasis.	Y	Y	null			U
30111954	Asymptomatic Cardiac Metastasis in a Diagnosed Case of Squamous Cell Carcinoma of the Middle Third of Esophagus.	Y	Y	null			U
30113488	Aortic stenosis complicated by cardiogenic shock treated by transcatheter aortic valve replacement with extracorporeal membrane oxygenation: A case report.	Y	Y	Cardiogenic shock secondary to aortic stenosis (AS) is a challenging problem owing to the high mortality associated with treatment, and successful treatment of such patients has been rare.			S	Lessons
30130746	The Role of Demographic and Symbolic Features in Clinical Arabic Graphesthesia Testing.	N	Y	We aimed to describe the demographic and symbolic features that influence correct recognition of Arabic graphesthesia stimuli in healthy Arabic individuals.			S	Objective
30147886	Renal infarction in vascular Ehlers-Danlos syndrome masquerading as pyelonephritis.	Y	Y	null			U
30150330	Paraneoplastic cerebellar degeneration as a manifestation of metastatic recurrent carcinoma breast: rare scenario.	Y	Y	We report a case of a 52-year-old woman, which is a follow-up case of completely treated carcinoma breast presenting with paraneoplastic cerebellar degeneration which, on investigation, revealed metastatic disease with recurrence at previous scar site and metastasis to contralateral axilla.			U
30181977	Massive air embolism while removing a central venous catheter.	Y	Y	We experienced the case of a 61-year-old male who suffered from a paradoxical systemic air embolism while we removed a CVC.			U
30210906	Progressive edematous lesions in subacute phase after neuroendovascular therapy.	Y	Y	In this report, a case with progressive edematous lesions in the subacute phase after neuroendovascular therapy was described, and the clinical features and therapeutic strategies were discussed.			S	Background
30211381	Midfoot Degenerative Arthritis and Partial Fusion After Pediatric Lisfranc Fracture-Dislocation.	Y	Y	null			U
30212365	Efficacy of Dehydrated Human Amniotic Membrane Allograft for the Treatment of Severe Extravasation Injuries in Preterm Neonates.	Y	Y	This case series of 4 neonatal patients describes the experience and efficacy of using a dehydrated human amniotic membrane allograft (dHAMA) in the treatment of severe extravasation injuries.			S	Objective
30213677	Surpass Flow Diverter in the Treatment of Ruptured Intracranial Aneurysms-A Single-Center Experience.	Y	Y	Use of a Surpass flow diverter (FD) device in the treatment of acutely ruptured aneurysm has not been well studied and reported in the literature.			S	Background
30214783	Prenatally diagnosed large mediastinal lymphangioma: A case report.	Y	Y	null			U
30219091	Chilaiditi syndrome - a rare case of pneumoperitoneum in the emergency department: a case report.	Y	Y	We present a rare case of a 49-year-old Egyptian man who presented to our emergency department complaining of cough and vague abdominal discomfort who was found to have Chilaiditi syndrome diagnosed radiologically by computed tomography scan.			S	Conclusions
30232073	Cutaneous angioleiomyoma of the auricle: a painless variant of a painful tumour.	Y	Y	Herein, a new case of a painless auricular ALM in a 63-year-old man is reported.			U
30254190	A Case of Synchronous Bone Marrow Chronic Myelomonocytic Leukemia (CMML) and Nodal Marginal Zone Lymphoma (NMZL).	Y	Y	Combined myeloid leukemia and non-Hodgkin's lymphoma (NHL), either synchronous or metachronous, rarely occur in the same patient.			S	Background
30262524	Hypertrophic pachymeningoencephalitis associated with temporal giant cell arteritis.	Y	Y	We report the rare case of an 80-year-old male patient with hypertrophic pachymeningoencephalitis that may be associated with temporal arteritis.			U
30294177	Combined Periodontal-Orthodontic Treatment of Pathologic Tooth Migration: A Case Study with 10-Year Follow-Up.	Y	Y	Improvement of facial esthetics contributed to the self-confidence of an adult periodontal patient with pathologic tooth migration.			U
30302293	Primary Carnitine Deficiency: A Rare, Reversible Metabolic Cardiomyopathy.	Y	Y	null			U
30323729	Angiotensin-Converting Enzyme Inhibitor-Induced Gastrointestinal Angioedema: The First Danish Case Report.	Y	Y	A rare side effect of ACEI therapy is angioedema, which in very rare cases may present as gastrointestinal angioedema (GA).			U
30327746	Successfully Treated Traumatic Dislocation of a Thoracic Vertebra Caused by Minor Trauma in a Patient with Neurofibromatosis Type I A Case Report and Literature Review.	Y	Y	The authors reported a rare case of young women with neurofibromatosis type I (NF-I) who were successfully treated from the traumatic dislocation of a thoracic vertebra caused by a simple fall, and the relevant literature was reviewed.			U
30332508	The Role of Forensic Botany in Reconstructing the Dynamics of Trauma from High Falls.	N	Y	The analysis of botanical traces can be supportive, especially when the crime scene investigation and autopsy do not provide sufficient information.			U
30338071	Shisha smoking as a possible cause of bilateral granulomatous lung lesions.	Y	Y	A 19-year-old male who regularly smoked tobacco shisha pipes presented with pleuritic chest pain, dyspnoea, and cough. He was found to have multiple bilateral lung nodules on computed tomography.			U
30338175	A Cadaveric Case of a Circular Torcular Herophili.	Y	Y	Herein is a case report of a circularly-shaped torcular Herophili found during cadaveric dissection.			U
30349270	Combined therapy in the treatment of mixed etiology leg ulcer - case report.	Y	Y	This paper presents beneficial results of treatment applied to a 58-year-old patient with 1-month lasting painful chronic ulcers of both shins of mixed venous-arterial etiology, resistant to conservative therapy, which was performed by using the device Laserobaria-S for local combined physical therapy including simultaneous action of hyperbaric oxygen, extremely low-frequency (ELF) variable magne…			U
30355546	Electroclinical history of a five-year-old girl with GRIN1-related early-onset epileptic encephalopathy: a video-case study.	Y	Y	Here, we describe a five-year-old girl with an early-onset epileptic encephalopathy associated with an infantile hyperkinetic movement disorder and oculomotor abnormalities. Whole-exome sequencing identified a novel p.Met641Leu de novo variant in the GRIN1 gene as the cause of the phenotype.			U
30360754	Poland syndrome accompanied by internal iliac artery supply disruption sequence: a case report.	Y	Y	The present case can be considered a rare atypical phenotype of Poland syndrome with possible subclavian artery supply disruption sequence with internal iliac artery supply disruption.			S	Conclusions
30364725	Direct pulmonary infiltrates as an initial manifestation of chronic lymphocytic leukemia.	Y	Y	A diagnosis of chronic lymphocytic leukemia (CLL) was made and direct pulmonary involvement of CLL was confirmed simultaneously.			U
30365656	Locoregional recurrence of Frantz' tumor: a case report and review of the literature.	Y	Y	The objective of this study is to report a rare case of locoregional recurrence and to review the radiological findings of solid pseudopapillary tumours of the pancreas in the literature, as well to know the incidence and risk factors of tumor recurrence.			U
30395683	Enhanced Depth Imaging Optical Coherence Tomography of Posterior Globe Rupture.	Y	Y	This case demonstrates the potential for occult open globe injuries with preserved visual function in cases of blunt ocular trauma, and the first to document EDI SD-OCT findings of a posterior globe rupture.			U
30410402	An ioMRI-assisted case of cervical intramedullary diffuse glioma resection.	Y	Y	This report describes a technology design of high-field ioMRI accessible for multioperation rooms via a case presentation of an imaging-assisted surgical excision of human cervical spinal cord diffuse glioma.			S	Purpose
30425941	Giant exophytic renal angiomyolipoma masquerading as a retroperitoneal liposarcoma: A case report and review of literature.	Y	Y	We present this case to share our experience of managing a case of giant exophytic AML which resembled retroperitoneal liposarcoma closely and resulted into an aggressive surgery.			U
30464167	Sigmoido-Cecal Fistula: A Rare Case of Complicated Recurrent Diverticulitis and a Review of the Literature.	Y	Y	Herein, we describe a rare case of colo-colonic fistula-complicated diverticulitis that necessitated urgent surgical intervention			S	Background
30473582	Improved Detection of Culprit Pathogens by Bacterial DNA Sequencing Affects Antibiotic Management Decisions in Severe Pneumonia.	Y	Y	In this case report, we demonstrate how direct-from-sample sequencing of bacterial DNA could have identified the multiple culprit pathogens early in the disease course to guide appropriate antibiotic management.			S	Background
30473905	Pregnancy after Aortic Root Replacement in Marfan's Syndrome: A Case Series and Review of the Literature.	Y	Y	We sought to characterize pregnancy-related aortic complications in women with Marfan's syndrome who had prior aortic root replacement.			S	Objectives
30483094	Breast Cancer Metastasis in the Skin with Hyperkeratotic Pigmentation Caused by Melanocyte Colonization.	Y	Y	In this report, we describe a case of breast cancer metastasis in the skin with prominent hyperkeratotic pigmentation caused by nonneoplastic melanocyte colonization.			U
30483352	Use of PEG-asparaginase in a case of Hepatosplenic γδ T-cell lymphoma with long-term remission after stem cell transplantation.	Y	Y	We report the use of pegylated-asparaginase (PEG-asparaginase) along with a conventional anthracycline-containing regimen in a 51-year-old male who was diagnosed with HSTCL, achieved a complete remission, and subsequently underwent peripheral blood SCT and remained in remission at the time of this case report.			U
30505390	High-quality-draft genome sequence of the heavy metal resistant and exopolysaccharides producing bacterium Mucilaginibacter pedocola TBZ30T.	N	Y	Here we describe the genome sequence and annotation of strain TBZ30T.			U
30515340	Arterial Stiffness in a Toddler with Neurofibromatosis Type 1 and Refractory Hypertension.	Y	Y	We report the case of a 4-year-old girl with NF type 1 and midaortic syndrome whose changes in blood pressure and pulse wave velocity suggested the evolution of vasculopathy, diagnosis of renovascular hypertension, and provided insights of response to treatment.			U
30533989	Surgical Management of Onychoheterotopia.	Y	Y	Herein, we report a case of a 35-year-old man with post-traumatic onychoheterotopia of left middle finger, who was treated with surgical avulsion of the ectopic nail along with chemical matricectomy of the well-formed ectopic matrix.			U
30545544	Copy number variation profile in noninvasive prenatal testing (NIPT) can identify co-existing maternal malignancies: Case reports and a literature review.	Y	Y	Malignancy in pregnant women potentially affects the copy number variation (CNV) profile in NIPT results.			S	Conclusion
30548331	Primary cutaneous CD4+ small- to medium-sized pleomorphic T-cell lymphoproliferative disorder in a pediatric patient successfully treated with low-dose radiation.	Y	Y	A 13-year-old boy presented to our clinic with a raised tumor with PCSM-LPD histology and was successfully treated with ultra-low-dose radiation therapy.			U
30573539	Closed loop small bowel obstruction due to paracaecal internal herniation: a lesson in rarity.	Y	Y	null			U
30584511	A Case Report of Tuberculosis of Isolated Radial Head A Rare Location with Diagnostic Dilemma.	Y	Y	null			S	Case report
30591906	Salmonella Typhimurium para-aortic root abscess managed non-surgically.	Y	Y	We describe a rare case of para-aortic root abscess due to Salmonella Typhimurium that was successfully managed medically.			S	Introduction
30593199	Discrepancy between perfusion- and diffusion-weighted images in ischemic stroke: A case report.	Y	Y	null			S
30596008	Crazy paving pattern as a rare radiological manifestation of peripheral T-cell lymphoma (PTCL) with lung involvement: A case report.	Y	Y	null			U
30623184	Recurrent, nodular lesions over the vulva: A diagnostic challenge.	Y	Y	null			U
30761246	Phalloplasty Following Penectomy for Fournier's Gangrene at a Tertiary Care Center.	Y	Y	This case demonstrates a rare case of Fournier's gangrene resulting in penectomy with a unique reconstruction utilizing a radial forearm free flap in a poor microsurgical candidate.			U
30820385	Anti-signal Recognition Particle Necrotizing Autoimmune Myopathy: An Atypical Presentation.	Y	Y	In this case report, we present the diagnosis of anti-SRP NAM in a middle-aged African American male.			U
30828559	Abernethy Malformation Type 2 and Biliary Atresia Coexistence: A Rare Cause of Infantile Liver Transplant.	Y	Y	Here we present a case of a female in infantile period who is a liver transplant candidate with biliary atresia and ventricular septal defect (VSD) accompanying Abernethy malformation type 2.			S	Introduction
30847186	Subclinical cerebral edema in diabetic ketoacidosis in children.	Y	Y	null			U
30880714	Fungal keratitis caused by Podospora austroamericana: A first case report.	Y	Y	We report a case of keratitis caused by a rare fungus Podospora austroamericana.	This is the first reported case of keratitis caused by P. austroamericana.	This is the first reported case of keratitis caused by P. austroamericana.	U
30914872	Anastomotic Leak after Bariatric Surgery from a Critical Care Perspective: A Lesson Shared.	Y	Y	The purpose of this paper is to present a patient who suffered from an anastomotic leak presenting 2 days after laparoscopic sleeve gastrectomy in our intensive care unit.			U
30949003	Anesthetic management for cesarean section and tubal ligation in a patient with Marfan syndrome, multiple sclerosis, and multiple postdural puncture headaches.	Y	Y	A neuraxial anesthetic technique is usually preferred in patients undergoing cesarean delivery, and it is safe to perform this technique in patients with either Marfan syndrome or multiple sclerosis.			U
30976254	Are the Generations and Gender Surveys Well Suited for Studying Same-Sex Couples?	N	Y	The aim of this paper is to demonstrate the problematic nature of the indicator in order to avoid inappropriate use of GGS data (and other surveys more generally) and to discuss the reliability of analyses of same-sex couples made with these data.			U
