# Supplementary material for: Identifying main finding sentences in clinical case reports
Source: Database (Oxford). 2020 Jun 11;2020:baaa041. doi: 10.1093/database/baaa041 (PMC7287507; doi:10.1093/database/baaa041)
Supplement: Table_S2_baaa041 [file table_s2_baaa041.xlsx]

## Sheet: Supplemental file 1 - Table S2-
Table S2 shows the list of items scored in feature 3.
frequent patterns items	sub pattern name
we * a case	string
we * case	string
report	string
present	string
describe	string
case	string
we+verb (VB Verb, base form)	pattern
we+verb (VBD Verb, past tense)	pattern
we+verb (VBP Verb, non¬3rd person singular present)	pattern
we + report	pattern
we + present	pattern
we + describe	pattern
we + conclude	pattern
we + herein	pattern
we + discuss	pattern
we + provide	pattern
aimed	pattern
used	pattern
encountered	pattern
sought	pattern
investigated	pattern
we report a	first three words
we present a	first three words
here , we	first three words
this is the	first three words
we describe the	first three words
we conclude that	first three words
this report describes	first three words
herein , we	first three words
in this report	first three words
we present an	first three words
we report on	first three words
we describe a	first three words
we report the	first three words
in this case	first three words
to our knowledge	first three words
the aim of	first three words
we describe an	first three words
we present the	first three words
we report two	first three words
in conclusion ,	first three words
we report here	first three words
we herein report	first three words
to report a	first three words
in this study	first three words
we aimed to	first three words
in this paper	first three words
we present one	first three words
to the best	first three words
we discuss the	first three words
a case of	first three words
in this article	first three words
the purpose of	first three words
this article presents	first three words
we present here	first three words
we sought to	first three words
the present study	first three words
this report presents	first three words
	first three words
