# Supplementary material for: Identifying main finding sentences in clinical case reports
Source: Database (Oxford). 2020 Jun 11;2020:baaa041. doi: 10.1093/database/baaa041 (PMC7287507; doi:10.1093/database/baaa041)
Supplement: Table_S3_baaa041 [file table_s3_baaa041.xlsx]

## Sheet: Supplemental file 1 - Table S3-
Table S3 shows the list of items scored in feature 4.
Negative words	Positive words
biopsy	our
there	via
some	very
often	removal
could	spinal
evaluation	this
he	woman
No	large
however	carcinoma
usually	due
discharged	with
However	using
It	developed
examination	confirmed
After	management
She	mutation
observed	acute
days	anterior
than	severe
important	reported
most	diagnosed
possible	a
normal	resection
There	an
weeks	associated
procedures	during
cause	failure
only	two
less	type
improved	successfully
control	wall
but	knowledge
%	This
available	single
or	novel
such	fracture
seen	laparoscopic
difficult	successful
follow-up	man
considered	following
because	multiple
potential	syndrome
further	female
were	study
she	caused
history	treated
other	who
complete	To
no	first
it
have
complications
pain
analysis
should
any
more
age
The
evidence
